# Supplementary material
Source: MDPI journal article supplement (https://www.mdpi.com/2077-0472/12/11/1867)
Supplement: s1 [file s1 › agriculture-1974737-supplementary.pdf]

Supplementary Material 1

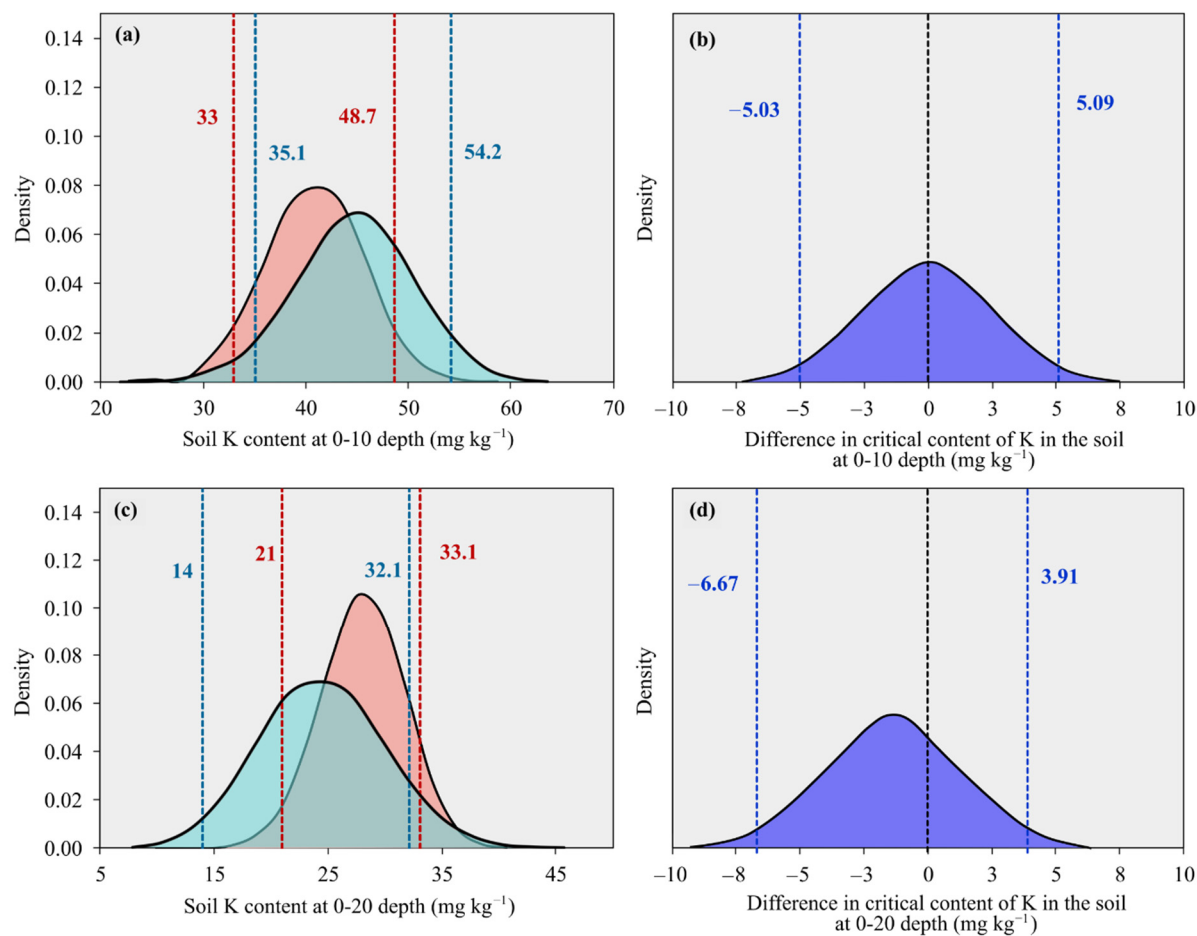

Figure S1. Density of frequency of the K critical content in the soil, at 0-10 and 0-20 cm depth, in 'Chardonnay' (CH) and 'Pinot Noir' (PN) (a, c), cultivated in sandy soil and fertilized with soil applied K. Difference in frequency density of the critical K content in the soil at 0-10 and 0-20 cm depth (b, d).
